# Supplementary material for: Investigating the yield of H 2 O and H 2 from methane oxidation in the stratosphere
Source: Copernicus journal article supplement (doi:10.5194/acp-18-9955-2018), 2018-07-13
Supplement: Supplementary file 1 [file supplement.pdf › supplement/supplement.pdf]

# Supplement of:

## Investigating the yield of H<sub>2</sub>O and H<sub>2</sub> from methane oxidation in the stratosphere

Franziska Frank<sup>1</sup>, Patrick Jöckel<sup>1</sup>, Sergey Gromov<sup>2,3</sup>, and Martin Dameris<sup>1</sup>

<sup>1</sup>Deutsches Zentrum für Luft- und Raumfahrt (DLR), Institut für Physik der Atmosphäre, Oberpfaffenhofen, Germany

<sup>2</sup>Max-Planck-Institute for Chemistry, Air Chemistry Departement, Mainz, Germany

<sup>3</sup>Institute of Global Climate and Ecology Roshydromet & RAS (IGCE), Moscow, Russia

*Correspondence to:* Franziska Frank (franziska.frank@dlr.de)

### Contents

|    |          |                                                                   |          |
|----|----------|-------------------------------------------------------------------|----------|
|    | <b>1</b> | <b>2D Profiles of Yield in the Global Simulation</b>              | <b>2</b> |
|    | <b>2</b> | <b>2D Profiles of the Ratio of H:H<sub>2</sub>:H<sub>2</sub>O</b> | <b>3</b> |
|    | <b>3</b> | <b>Results of the Box Model Simulations</b>                       | <b>4</b> |
| 5  | 3.1      | Exp1 . . . . .                                                    | 4        |
|    | 3.2      | Ref . . . . .                                                     | 6        |
|    | 3.3      | SS01 . . . . .                                                    | 8        |
|    | 3.4      | SS02 . . . . .                                                    | 10       |
|    | 3.5      | SS03 . . . . .                                                    | 12       |
| 10 | 3.6      | SS04 . . . . .                                                    | 14       |
|    | 3.7      | SS05 . . . . .                                                    | 16       |

## 1 2D Profiles of Yield in the Global Simulation

The panels of Fig. S1 show the zonal mean of the effective and direct yield as an annual and seasonal climatology. Overall, the vertical profile in the tropics generally applies to the mid latitudes as well. The area below the tropopause, where the yield peaks in values above 2, is also represented at higher latitudes, where the tropopause is lower than in the tropics. A notable exception is that in the summer hemisphere the yield below the tropopause is smaller and in the upper stratosphere larger than in the tropics. It is, however, not possible to apply the presented method to calculate yield of water vapour ( $H_2O$ ) from the oxidation of methane ( $CH_4$ ) ( $\gamma_{H_2O}$ ) in the winter polar region, since through the absence of sunlight the concentrations of hydroxyl radical (OH) are very low and therefore the loss of  $CH_4$  so small that numerical errors influence the calculation of  $\gamma_{H_2O}$  too much for a reliable estimate.

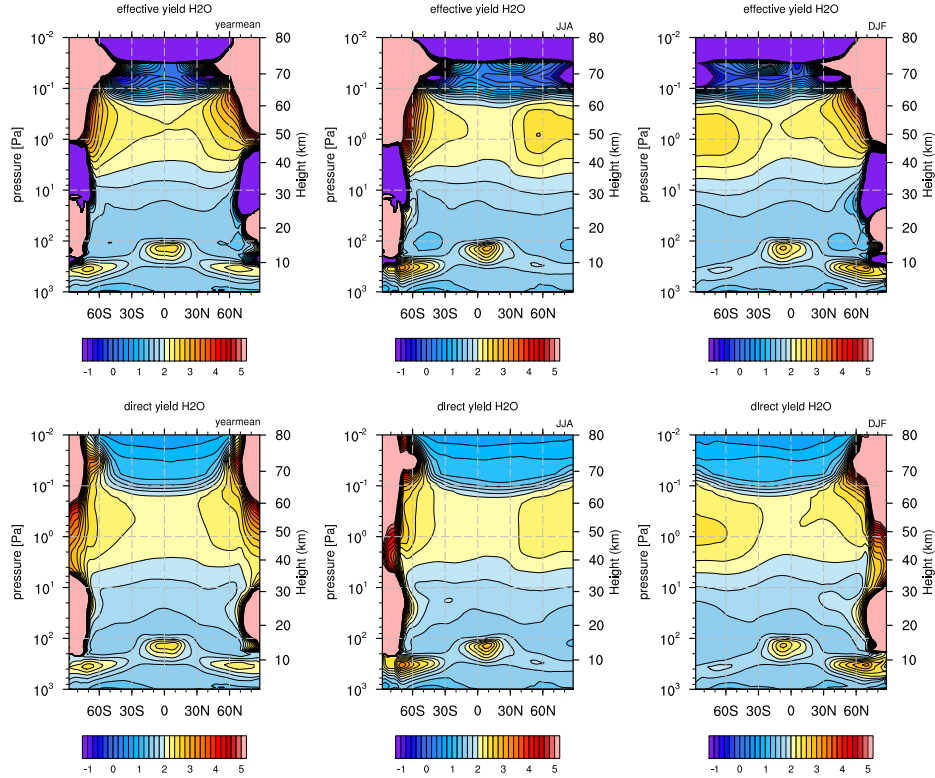

**Figure S1.** Zonal mean of effective (upper panels) and direct yield (lower panels) from global model as an annual climatology (left column), seasonal climatology of the months June, July and August (middle column) and of the months December, January and February (right column) respectively.

## 2 2D Profiles of the Ratio of $\text{H}:\text{H}_2:\text{H}_2\text{O}$

Considering the zonal mean of the H portions (see Fig. S2), it becomes again apparent that the tropical profile of the H portion is a good estimate for its annual climatology. The local minimum at the tropopause is, for example, evident throughout the year. In the summer hemispheres the hydrogen content in  $\text{H}_2\text{O}$  increases in the upper stratosphere and mesosphere, while it decreases substantially at the same altitudes in the winter hemisphere. Where the share of H portion of  $\text{H}_2\text{O}$  is low the share of hydrogen gas ( $\text{H}_2$ ) increases. For polar stratospheric clouds variations in the ratio of  $\text{H}_2\text{O}$  to  $\text{H}_2$  are decisive. An investigation of this influence is, however, beyond the scope of this study.

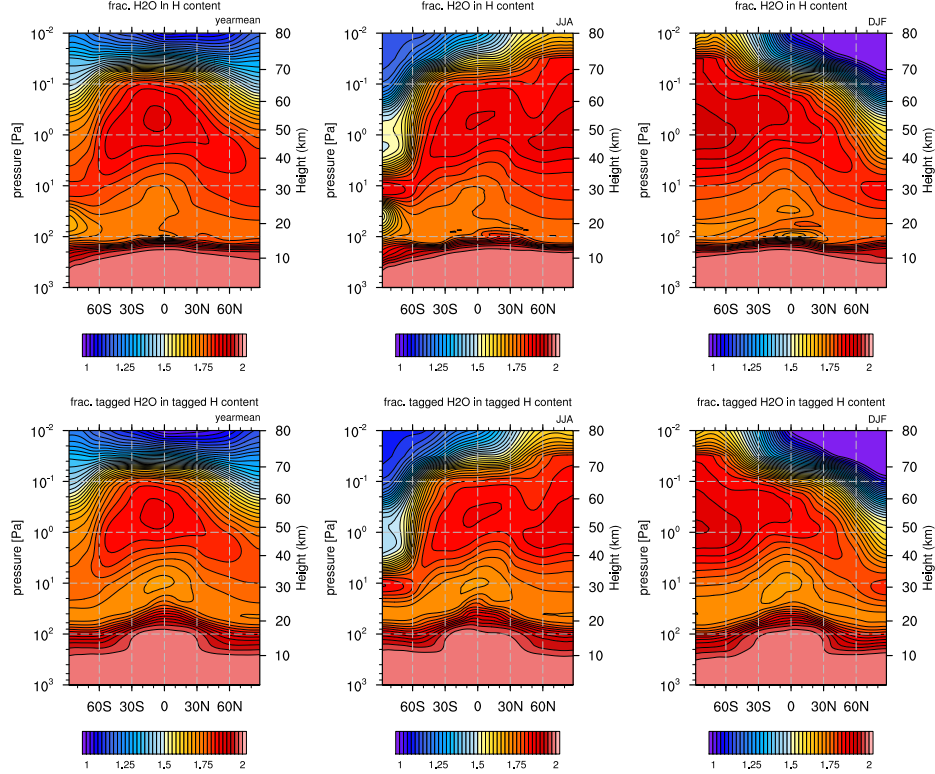

**Figure S2.** Zonal mean of un-tagged (upper panels) and tagged (lower panels) H portion in  $\text{H}_2\text{O}$  with respect to the un-tagged and tagged hydrogen content ( $\text{H}+2\times\text{H}_2+2\times\text{H}_2\text{O}$ ) as annual climatology (left column), seasonal climatology of the months June, July and August (middle column) and of the months December, January and February (right column) respectively.

### 3 Results of the Box Model Simulations

#### 3.1 Exp1

**Table S1.** Values for H2O in Exp1

| pressure<br>[hPa] | loss CH4<br>[nmol mol-1 yr-1] | prim. prod. H2O<br>[nmol mol-1 yr-1] | prim. loss H2O<br>[nmol mol-1 yr-1] | sec. prod. H2O<br>[nmol mol-1 yr-1] | sec. loss H2O<br>[nmol mol-1 yr-1] | direct yield<br>[-] | effective yield<br>[-] |
|-------------------|-------------------------------|--------------------------------------|-------------------------------------|-------------------------------------|------------------------------------|---------------------|------------------------|
| 0.01              | 1917.1093                     | 1258.1943                            | 819.6558                            | 868.5772                            | 565.0148                           | 0.6563              | 0.3871                 |
| 0.02              | 1920.4814                     | 1378.9709                            | 1243.0511                           | 1985.6976                           | 1789.7012                          | 0.7180              | 0.1728                 |
| 0.04              | 1567.9248                     | 1536.7456                            | 1460.5072                           | 8215.1387                           | 7807.8486                          | 0.9801              | 0.3084                 |
| 0.06              | 815.0206                      | 898.4715                             | 851.5042                            | 7228.4312                           | 6851.0942                          | 1.1024              | 0.5206                 |
| 0.08              | 330.9046                      | 435.9221                             | 411.6228                            | 4326.1904                           | 4085.3777                          | 1.3174              | 0.8012                 |
| 0.10              | 354.1445                      | 509.4264                             | 483.7607                            | 6448.2222                           | 6123.5918                          | 1.4385              | 0.9891                 |
| 0.20              | 248.4486                      | 496.8959                             | 461.8084                            | 6529.9116                           | 6068.1099                          | 2.0000              | 2.0000                 |
| 0.25              | 317.1020                      | 634.2027                             | 582.3067                            | 7107.6855                           | 6525.3833                          | 2.0000              | 2.0000                 |
| 0.50              | 647.9127                      | 1295.8253                            | 1041.9595                           | 5317.7563                           | 4275.7974                          | 2.0000              | 2.0000                 |
| 1.00              | 1117.6545                     | 2235.3079                            | 1468.8796                           | 4284.1123                           | 2815.2332                          | 2.0000              | 2.0000                 |
| 2.00              | 1175.4083                     | 2350.8157                            | 1317.5927                           | 2997.7107                           | 1680.1178                          | 2.0000              | 2.0000                 |
| 4.00              | 862.8663                      | 1723.5771                            | 871.0848                            | 1761.1121                           | 890.0270                           | 1.9975              | 1.9975                 |
| 5.00              | 738.7663                      | 1464.9867                            | 722.2376                            | 1424.4871                           | 702.2541                           | 1.9830              | 1.9830                 |
| 6.00              | 595.3466                      | 1168.4746                            | 561.6932                            | 1081.6173                           | 519.9347                           | 1.9627              | 1.9627                 |
| 8.00              | 432.5767                      | 827.8423                             | 386.2204                            | 723.9407                            | 337.7455                           | 1.9137              | 1.9137                 |
| 10.00             | 297.9835                      | 554.7293                             | 249.1120                            | 452.0948                            | 203.0224                           | 1.8616              | 1.8615                 |
| 15.00             | 193.2374                      | 347.6617                             | 149.0496                            | 260.8025                            | 111.8129                           | 1.7991              | 1.7988                 |
| 20.00             | 117.6032                      | 206.2219                             | 81.1034                             | 133.5830                            | 52.5370                            | 1.7535              | 1.7531                 |
| 30.00             | 79.9943                       | 137.2668                             | 47.5862                             | 72.7755                             | 25.2227                            | 1.7160              | 1.7155                 |
| 40.00             | 53.1989                       | 90.2145                              | 24.8173                             | 34.1195                             | 9.2971                             | 1.6958              | 1.6959                 |
| 50.00             | 44.6790                       | 75.4166                              | 18.1324                             | 23.7102                             | 5.5567                             | 1.6880              | 1.6884                 |
| 60.00             | 34.1557                       | 58.2252                              | 8.5872                              | 9.9817                              | 1.3638                             | 1.7047              | 1.7056                 |
| 80.00             | 31.2933                       | 54.6421                              | 3.1229                              | 3.2992                              | 0.1714                             | 1.7461              | 1.7463                 |
| 90.00             | 32.8238                       | 57.6864                              | 2.1720                              | 2.2171                              | 0.0774                             | 1.7575              | 1.7565                 |
| 100.00            | 35.8189                       | 63.0893                              | 1.5539                              | 1.4907                              | 0.0349                             | 1.7613              | 1.7586                 |
| 120.00            | 40.4032                       | 69.8148                              | 1.4292                              | 1.2055                              | 0.0224                             | 1.7280              | 1.7219                 |
| 140.00            | 38.8669                       | 66.0524                              | 1.8469                              | 1.6469                              | 0.0326                             | 1.6995              | 1.6935                 |
| 160.00            | 38.7104                       | 65.6202                              | 2.1579                              | 2.0107                              | 0.0418                             | 1.6952              | 1.6903                 |
| 180.00            | 37.8395                       | 63.3394                              | 2.2637                              | 2.2041                              | 0.0435                             | 1.6739              | 1.6712                 |
| 200.00            | 39.0952                       | 64.8123                              | 2.4269                              | 2.3771                              | 0.0476                             | 1.6578              | 1.6553                 |
| 250.00            | 50.4316                       | 82.8999                              | 3.1987                              | 3.1354                              | 0.0628                             | 1.6438              | 1.6413                 |
| 300.00            | 80.7958                       | 135.6818                             | 4.9048                              | 4.8297                              | 0.0894                             | 1.6793              | 1.6773                 |
| 400.00            | 176.0176                      | 308.7615                             | 10.0708                             | 9.9343                              | 0.1649                             | 1.7542              | 1.7524                 |
| 600.00            | 254.1102                      | 390.7552                             | 9.8457                              | 7.8480                              | 0.0998                             | 1.5377              | 1.5295                 |
| 1000.00           | 134.5239                      | 164.2375                             | 1.2036                              | 0.7443                              | 0.0027                             | 1.2209              | 1.2209                 |

**Table S2.** Values for H2 in Exp1

| pressure | loss CH4                                   | prim. prod. H2                             | prim. loss H2                              | sec. prod. H2                              | sec. loss H2                               | direct yield | effective yield |
|----------|--------------------------------------------|--------------------------------------------|--------------------------------------------|--------------------------------------------|--------------------------------------------|--------------|-----------------|
| [hPa]    | [nmol mol <sup>-1</sup> yr <sup>-1</sup> ] | [-]          | [-]             |
| 0.01     | 32.8238                                    | 17.1165                                    | 8.7060                                     | 0.0084                                     | 0.0043                                     | 1.6142       | 1.6129          |
| 0.02     | 330.9046                                   | 432.4914                                   | 67.2743                                    | 37.2794                                    | 5.8004                                     | 1.8280       | 1.8272          |
| 0.04     | 432.5768                                   | 160.0545                                   | 122.7173                                   | 0.0412                                     | 0.0316                                     | 1.6988       | 1.6916          |
| 0.06     | 31.2933                                    | 16.5110                                    | 8.2205                                     | 0.0069                                     | 0.0034                                     | 1.5179       | 1.4794          |
| 0.08     | 815.0206                                   | 1237.0828                                  | 84.7577                                    | 57.3419                                    | 3.9294                                     | 1.3070       | 1.1988          |
| 0.10     | 595.3474                                   | 194.9620                                   | 172.7311                                   | 0.0361                                     | 0.0320                                     | 1.1948       | 1.0109          |
| 0.20     | 34.1557                                    | 18.3832                                    | 8.1400                                     | 0.0084                                     | 0.0037                                     | 0.3404       | 0.0000          |
| 0.25     | 254.1104                                   | 112.3087                                   | 37.9123                                    | 0.8334                                     | 0.2812                                     | 0.2548       | 0.0000          |
| 0.50     | 647.9126                                   | 83.9009                                    | 83.9001                                    | 1.1670                                     | 1.1669                                     | 0.1295       | 0.0000          |
| 1.00     | 738.7661                                   | 217.3730                                   | 204.8212                                   | 0.0306                                     | 0.0288                                     | 0.1237       | 0.0000          |
| 2.00     | 44.6790                                    | 24.0232                                    | 9.9814                                     | 0.0155                                     | 0.0064                                     | 0.1682       | 0.0000          |
| 4.00     | 1567.9249                                  | 2663.6274                                  | 65.5622                                    | 55.6063                                    | 1.3688                                     | 0.2580       | 0.0025          |
| 5.00     | 862.8660                                   | 222.6293                                   | 220.4723                                   | 0.0226                                     | 0.0224                                     | 0.2942       | 0.0170          |
| 6.00     | 53.1989                                    | 28.3828                                    | 12.1118                                    | 0.0246                                     | 0.0105                                     | 0.3275       | 0.0373          |
| 8.00     | 176.0175                                   | 73.7215                                    | 37.7322                                    | 0.6454                                     | 0.3300                                     | 0.3700       | 0.0863          |
| 10.00    | 79.9943                                    | 41.5943                                    | 18.7922                                    | 0.0425                                     | 0.0192                                     | 0.4141       | 0.1386          |
| 15.00    | 80.7957                                    | 38.1473                                    | 16.6900                                    | 0.2451                                     | 0.1070                                     | 0.4626       | 0.2013          |
| 20.00    | 1920.4814                                  | 3510.5625                                  | 18.4543                                    | 17.0534                                    | 0.0898                                     | 0.4986       | 0.2473          |
| 30.00    | 317.1024                                   | 80.7949                                    | 80.7896                                    | 10.3658                                    | 10.3647                                    | 0.5200       | 0.2853          |
| 40.00    | 50.4316                                    | 25.1512                                    | 10.0118                                    | 0.1088                                     | 0.0431                                     | 0.5335       | 0.3061          |
| 50.00    | 248.4489                                   | 84.5781                                    | 84.5716                                    | 16.2928                                    | 16.2910                                    | 0.5377       | 0.3145          |
| 60.00    | 1175.4092                                  | 197.6494                                   | 197.6482                                   | 0.0210                                     | 0.0210                                     | 0.5382       | 0.3000          |
| 80.00    | 117.6032                                   | 58.6404                                    | 29.5825                                    | 0.0542                                     | 0.0274                                     | 0.5276       | 0.2650          |
| 90.00    | 39.0952                                    | 19.9434                                    | 7.8514                                     | 0.0591                                     | 0.0231                                     | 0.5215       | 0.2564          |
| 100.00   | 1917.1086                                  | 3094.5813                                  | 6.4022                                     | 3.8562                                     | 0.0080                                     | 0.5130       | 0.2527          |
| 120.00   | 37.8396                                    | 19.4147                                    | 7.8198                                     | 0.0496                                     | 0.0199                                     | 0.5055       | 0.2735          |
| 140.00   | 38.7104                                    | 19.7894                                    | 8.2465                                     | 0.0377                                     | 0.0157                                     | 0.5106       | 0.2959          |
| 160.00   | 193.2375                                   | 89.3834                                    | 50.5064                                    | 0.0558                                     | 0.0315                                     | 0.5112       | 0.2988          |
| 180.00   | 38.8668                                    | 19.8472                                    | 8.3671                                     | 0.0329                                     | 0.0138                                     | 0.5131       | 0.3072          |
| 200.00   | 40.4032                                    | 20.4247                                    | 9.3857                                     | 0.0232                                     | 0.0107                                     | 0.5101       | 0.3102          |
| 250.00   | 354.1446                                   | 423.1427                                   | 104.5756                                   | 52.3713                                    | 12.9461                                    | 0.4987       | 0.3015          |
| 300.00   | 1117.6539                                  | 138.2324                                   | 138.2310                                   | 0.1722                                     | 0.1722                                     | 0.4721       | 0.2673          |
| 400.00   | 297.9837                                   | 123.3905                                   | 82.1122                                    | 0.0461                                     | 0.0307                                     | 0.4188       | 0.2063          |
| 600.00   | 35.8189                                    | 18.3753                                    | 9.3289                                     | 0.0116                                     | 0.0059                                     | 0.4420       | 0.2949          |
| 1000.00  | 134.5239                                   | 82.4899                                    | 4.2614                                     | 0.1497                                     | 0.0077                                     | 0.6132       | 0.6132          |

### 3.2 Ref

**Table S3.** Values for H2O in Ref

| pressure | loss CH4          | prim. prod. H2O   | prim. loss H2O    | sec. prod. H2O    | sec. loss H2O     | direct yield | effective yield |
|----------|-------------------|-------------------|-------------------|-------------------|-------------------|--------------|-----------------|
| [hPa]    | [nmol mol-1 yr-1] | [-]          | [-]             |
| 0.01     | 1916.8042         | 1086.3535         | 1048.9749         | 1185.1133         | 1144.3433         | 0.5668       | 0.0408          |
| 0.02     | 1919.5883         | 1367.3448         | 1313.4905         | 2371.8792         | 2278.3296         | 0.7123       | 0.0768          |
| 0.04     | 1565.6472         | 1481.0541         | 1394.4912         | 5921.4658         | 5575.2847         | 0.9460       | 0.2764          |
| 0.06     | 808.8222          | 912.3744          | 876.5737          | 5038.4727         | 4841.4878         | 1.1280       | 0.2878          |
| 0.08     | 319.7195          | 447.2575          | 438.0138          | 2990.5637         | 2929.2996         | 1.3989       | 0.2205          |
| 0.10     | 341.1670          | 521.3764          | 508.8003          | 3623.2104         | 3536.2605         | 1.5282       | 0.2917          |
| 0.20     | 214.6349          | 429.2681          | 428.2884          | 2916.2593         | 2909.4502         | 2.0000       | 0.0363          |
| 0.25     | 279.8951          | 559.7884          | 558.3185          | 3872.8921         | 3862.5020         | 2.0000       | 0.0424          |
| 0.50     | 580.3633          | 1160.7261         | 1077.1849         | 4830.4058         | 4482.5776         | 2.0000       | 0.7433          |
| 1.00     | 1063.3245         | 2126.6477         | 1140.1077         | 2457.7378         | 1317.6302         | 2.0000       | 2.0000          |
| 2.00     | 1187.9875         | 2375.9729         | 576.9183          | 761.9608          | 185.0425          | 2.0000       | 2.0000          |
| 4.00     | 895.0134          | 1778.7972         | 292.5617          | 350.1597          | 57.5985           | 1.9875       | 1.9875          |
| 5.00     | 769.0637          | 1506.1696         | 203.6251          | 235.4593          | 31.8355           | 1.9584       | 1.9584          |
| 6.00     | 617.5189          | 1188.6660         | 140.1327          | 158.8602          | 18.7292           | 1.9249       | 1.9249          |
| 8.00     | 449.4256          | 844.3197          | 79.2058           | 87.4038           | 8.1997            | 1.8787       | 1.8787          |
| 10.00    | 307.7070          | 564.2828          | 54.7397           | 60.6180           | 5.8805            | 1.8338       | 1.8338          |
| 15.00    | 205.2432          | 366.9352          | 30.6975           | 33.4976           | 2.8024            | 1.7878       | 1.7878          |
| 20.00    | 125.0500          | 218.0648          | 19.1280           | 20.9642           | 1.8389            | 1.7438       | 1.7438          |
| 30.00    | 89.5452           | 153.6822          | 8.9137            | 9.4615            | 0.5488            | 1.7163       | 1.7162          |
| 40.00    | 61.5042           | 104.2324          | 4.1206            | 4.2904            | 0.1696            | 1.6947       | 1.6947          |
| 50.00    | 55.4957           | 94.0130           | 2.3572            | 2.4183            | 0.0606            | 1.6941       | 1.6941          |
| 60.00    | 41.5033           | 70.1394           | 1.2526            | 1.2761            | 0.0228            | 1.6900       | 1.6900          |
| 80.00    | 34.9607           | 59.4718           | 0.5952            | 0.5976            | 0.0060            | 1.7011       | 1.7010          |
| 90.00    | 36.3509           | 62.0817           | 0.4557            | 0.4476            | 0.0033            | 1.7078       | 1.7075          |
| 100.00   | 38.7497           | 66.3182           | 0.3711            | 0.3451            | 0.0019            | 1.7115       | 1.7107          |
| 120.00   | 45.8798           | 78.2013           | 0.5046            | 0.4107            | 0.0026            | 1.7045       | 1.7024          |
| 140.00   | 48.8163           | 82.8270           | 1.0747            | 0.9208            | 0.0112            | 1.6967       | 1.6933          |
| 160.00   | 52.2214           | 88.7913           | 1.5558            | 1.3972            | 0.0210            | 1.7003       | 1.6968          |
| 180.00   | 49.4261           | 83.2931           | 2.3941            | 2.3052            | 0.0421            | 1.6852       | 1.6826          |
| 200.00   | 49.6510           | 83.1572           | 2.7342            | 2.6752            | 0.0513            | 1.6748       | 1.6726          |
| 250.00   | 56.1950           | 93.3549           | 3.4830            | 3.4534            | 0.0684            | 1.6613       | 1.6595          |
| 300.00   | 70.8472           | 118.3622          | 4.2906            | 4.2769            | 0.0792            | 1.6707       | 1.6694          |
| 400.00   | 123.4280          | 210.8178          | 6.9562            | 6.9284            | 0.1154            | 1.7080       | 1.7069          |
| 600.00   | 270.5331          | 425.7514          | 10.7052           | 8.7467            | 0.1112            | 1.5737       | 1.5661          |
| 1000.00  | 389.8932          | 553.6271          | 4.0120            | 2.6731            | 0.0098            | 1.4199       | 1.4199          |

**Table S4.** Values for H2 in Ref

| pressure<br>[hPa] | loss CH4<br>[nmol mol-1 yr-1] | prim. prod. H2<br>[nmol mol-1 yr-1] | prim. loss H2<br>[nmol mol-1 yr-1] | sec. prod. H2<br>[nmol mol-1 yr-1] | sec. loss H2<br>[nmol mol-1 yr-1] | direct yield<br>[-] | effective yield<br>[-] |
|-------------------|-------------------------------|-------------------------------------|------------------------------------|------------------------------------|-----------------------------------|---------------------|------------------------|
| 0.01              | 36.3509                       | 18.4479                             | 7.7105                             | 0.0023                             | 0.0009                            | 1.9577              | 1.9592                 |
| 0.02              | 319.7195                      | 402.5815                            | 118.5530                           | 122.3434                           | 36.0357                           | 1.9200              | 1.9232                 |
| 0.04              | 449.4256                      | 163.7093                            | 109.1757                           | 0.0068                             | 0.0045                            | 1.7420              | 1.7236                 |
| 0.06              | 34.9607                       | 17.9573                             | 7.4232                             | 0.0017                             | 0.0007                            | 1.4651              | 1.4121                 |
| 0.08              | 808.8222                      | 1185.0426                           | 162.1303                           | 138.1292                           | 18.9011                           | 1.2592              | 1.1583                 |
| 0.10              | 617.5189                      | 197.1238                            | 150.7504                           | 0.0075                             | 0.0057                            | 1.1024              | 0.8573                 |
| 0.20              | 41.5033                       | 21.4047                             | 8.5026                             | 0.0016                             | 0.0007                            | 0.2795              | 0.0000                 |
| 0.25              | 270.5331                      | 111.7407                            | 37.6832                            | 0.8101                             | 0.2731                            | 0.2259              | 0.0000                 |
| 0.50              | 580.3634                      | 75.2228                             | 75.2219                            | 3.3326                             | 3.3323                            | 0.1296              | 0.0000                 |
| 1.00              | 769.0637                      | 215.7597                            | 183.8005                           | 0.0075                             | 0.0064                            | 0.1183              | 0.0000                 |
| 2.00              | 55.4957                       | 28.1749                             | 11.1765                            | 0.0024                             | 0.0010                            | 0.1550              | 0.0000                 |
| 4.00              | 1565.6472                     | 2727.3469                           | 153.7818                           | 132.4532                           | 7.4700                            | 0.2385              | 0.0125                 |
| 5.00              | 895.0134                      | 213.4234                            | 202.1929                           | 0.0064                             | 0.0060                            | 0.2805              | 0.0416                 |
| 6.00              | 61.5042                       | 31.3171                             | 12.5238                            | 0.0038                             | 0.0015                            | 0.3192              | 0.0751                 |
| 8.00              | 123.4280                      | 57.7362                             | 24.6907                            | 0.4303                             | 0.1837                            | 0.3643              | 0.1213                 |
| 10.00             | 89.5452                       | 44.3419                             | 18.9230                            | 0.0061                             | 0.0026                            | 0.4060              | 0.1662                 |
| 15.00             | 70.8472                       | 34.3793                             | 13.1360                            | 0.1665                             | 0.0635                            | 0.4444              | 0.2122                 |
| 20.00             | 1919.5883                     | 3685.5903                           | 48.8383                            | 55.7574                            | 0.7396                            | 0.4802              | 0.2563                 |
| 30.00             | 279.8951                      | 63.2418                             | 63.2383                            | 19.2653                            | 19.2637                           | 0.4952              | 0.2839                 |
| 40.00             | 56.1950                       | 27.1117                             | 9.7868                             | 0.0751                             | 0.0270                            | 0.5092              | 0.3056                 |
| 50.00             | 214.6349                      | 59.9931                             | 59.9895                            | 22.5709                            | 22.5691                           | 0.5077              | 0.3063                 |
| 60.00             | 1187.9875                     | 184.1197                            | 184.1172                           | 0.0052                             | 0.0052                            | 0.5157              | 0.3109                 |
| 80.00             | 125.0500                      | 60.0512                             | 28.0084                            | 0.0086                             | 0.0040                            | 0.5136              | 0.3013                 |
| 90.00             | 49.6510                       | 23.8813                             | 8.5974                             | 0.0393                             | 0.0141                            | 0.5075              | 0.2954                 |
| 100.00            | 1916.8042                     | 3752.4705                           | 12.1424                            | 15.1728                            | 0.0492                            | 0.4999              | 0.2922                 |
| 120.00            | 49.4261                       | 23.7615                             | 8.7057                             | 0.0324                             | 0.0118                            | 0.4856              | 0.2962                 |
| 140.00            | 52.2214                       | 24.8176                             | 9.3376                             | 0.0228                             | 0.0086                            | 0.4808              | 0.3014                 |
| 160.00            | 205.2432                      | 91.2163                             | 47.6608                            | 0.0079                             | 0.0041                            | 0.4752              | 0.2967                 |
| 180.00            | 48.8163                       | 23.4725                             | 8.7713                             | 0.0187                             | 0.0070                            | 0.4807              | 0.3050                 |
| 200.00            | 45.8798                       | 22.2784                             | 8.6929                             | 0.0101                             | 0.0040                            | 0.4810              | 0.3083                 |
| 250.00            | 341.1670                      | 376.0900                            | 149.9699                           | 110.3882                           | 44.0293                           | 0.4825              | 0.3092                 |
| 300.00            | 1063.3245                     | 125.7608                            | 125.7594                           | 0.0780                             | 0.0780                            | 0.4853              | 0.3013                 |
| 400.00            | 307.7070                      | 124.9258                            | 73.7913                            | 0.0072                             | 0.0042                            | 0.4678              | 0.2697                 |
| 600.00            | 38.7497                       | 19.3692                             | 8.0468                             | 0.0035                             | 0.0014                            | 0.4130              | 0.2757                 |
| 1000.00           | 389.8932                      | 177.3043                            | 16.6462                            | 0.3442                             | 0.0323                            | 0.4548              | 0.4548                 |

### 3.3 SS01

**Table S5.** Values for H2O in SS01

| pressure | loss CH4                                   | prim. prod. H2O                            | prim. loss H2O                             | sec. prod. H2O                             | sec. loss H2O                              | direct yield | effective yield |
|----------|--------------------------------------------|--------------------------------------------|--------------------------------------------|--------------------------------------------|--------------------------------------------|--------------|-----------------|
| [hPa]    | [nmol mol <sup>-1</sup> yr <sup>-1</sup> ] | [-]          | [-]             |
| 0.01     | 1916.4918                                  | 648.9949                                   | 646.4947                                   | 505.8346                                   | 503.8989                                   | 0.3386       | 0.0023          |
| 0.02     | 1918.7546                                  | 1274.8889                                  | 1268.1830                                  | 1362.7478                                  | 1355.5673                                  | 0.6644       | 0.0072          |
| 0.04     | 1561.7603                                  | 1498.7343                                  | 1481.7581                                  | 3727.7241                                  | 3685.8247                                  | 0.9596       | 0.0377          |
| 0.06     | 801.9331                                   | 907.6525                                   | 903.9208                                   | 1818.5702                                  | 1811.5344                                  | 1.1318       | 0.0134          |
| 0.08     | 310.8306                                   | 439.9582                                   | 439.7443                                   | 1030.1494                                  | 1029.9108                                  | 1.4154       | 0.0015          |
| 0.10     | 328.7188                                   | 501.1739                                   | 500.8932                                   | 1230.3495                                  | 1229.9161                                  | 1.5246       | 0.0022          |
| 0.20     | 190.9330                                   | 381.8643                                   | 381.9021                                   | 935.7492                                   | 935.8069                                   | 2.0000       | -0.0005         |
| 0.25     | 246.9136                                   | 493.8255                                   | 493.8717                                   | 1260.8860                                  | 1260.9547                                  | 2.0000       | -0.0005         |
| 0.50     | 501.2253                                   | 955.6842                                   | 955.7430                                   | 1931.9720                                  | 1932.0178                                  | 1.9067       | -0.0002         |
| 1.00     | 886.6048                                   | 1700.8844                                  | 1630.4633                                  | 4364.6538                                  | 4183.8838                                  | 1.9184       | 0.2833          |
| 2.00     | 967.9517                                   | 1915.0850                                  | 1264.9290                                  | 2832.9390                                  | 1871.2062                                  | 1.9785       | 1.6653          |
| 4.00     | 728.7657                                   | 1412.1588                                  | 687.0246                                   | 1274.2139                                  | 619.9307                                   | 1.9377       | 1.8928          |
| 5.00     | 629.6415                                   | 1192.8501                                  | 484.8236                                   | 811.8930                                   | 329.9937                                   | 1.8945       | 1.8898          |
| 6.00     | 506.9423                                   | 942.5328                                   | 339.0827                                   | 529.5964                                   | 190.5278                                   | 1.8593       | 1.8592          |
| 8.00     | 370.8450                                   | 674.2853                                   | 197.3300                                   | 278.9563                                   | 81.6377                                    | 1.8182       | 1.8182          |
| 10.00    | 252.0401                                   | 446.6481                                   | 135.8468                                   | 195.2029                                   | 59.3701                                    | 1.7721       | 1.7721          |
| 15.00    | 165.1342                                   | 284.9094                                   | 74.6688                                    | 101.1696                                   | 26.5142                                    | 1.7253       | 1.7252          |
| 20.00    | 97.4300                                    | 163.8911                                   | 45.0675                                    | 62.1399                                    | 17.0873                                    | 1.6821       | 1.6820          |
| 30.00    | 66.8627                                    | 110.5772                                   | 19.7987                                    | 24.1113                                    | 4.3170                                     | 1.6538       | 1.6537          |
| 40.00    | 43.2429                                    | 70.6204                                    | 8.2790                                     | 9.3792                                     | 1.0995                                     | 1.6331       | 1.6331          |
| 50.00    | 37.5273                                    | 61.2516                                    | 4.3699                                     | 4.7070                                     | 0.3358                                     | 1.6322       | 1.6322          |
| 60.00    | 25.8492                                    | 42.2400                                    | 2.0657                                     | 2.1736                                     | 0.1063                                     | 1.6341       | 1.6342          |
| 80.00    | 19.5035                                    | 32.2898                                    | 0.8412                                     | 0.8624                                     | 0.0224                                     | 1.6556       | 1.6555          |
| 90.00    | 19.5982                                    | 32.6015                                    | 0.6030                                     | 0.6076                                     | 0.0112                                     | 1.6635       | 1.6632          |
| 100.00   | 20.3775                                    | 33.9462                                    | 0.4560                                     | 0.4450                                     | 0.0060                                     | 1.6659       | 1.6650          |
| 120.00   | 23.4725                                    | 38.7521                                    | 0.5404                                     | 0.4901                                     | 0.0066                                     | 1.6510       | 1.6485          |
| 140.00   | 24.7600                                    | 40.6171                                    | 0.9614                                     | 0.8990                                     | 0.0160                                     | 1.6404       | 1.6373          |
| 160.00   | 26.4438                                    | 43.4358                                    | 1.2347                                     | 1.1841                                     | 0.0228                                     | 1.6426       | 1.6398          |
| 180.00   | 24.9944                                    | 40.7031                                    | 1.4276                                     | 1.4160                                     | 0.0276                                     | 1.6285       | 1.6269          |
| 200.00   | 25.1002                                    | 40.5931                                    | 1.5208                                     | 1.5163                                     | 0.0303                                     | 1.6172       | 1.6159          |
| 250.00   | 28.3674                                    | 45.4227                                    | 1.7931                                     | 1.7892                                     | 0.0360                                     | 1.6012       | 1.5998          |
| 300.00   | 35.6866                                    | 57.4276                                    | 2.1333                                     | 2.1324                                     | 0.0398                                     | 1.6092       | 1.6081          |
| 400.00   | 62.0087                                    | 101.7611                                   | 3.3808                                     | 3.3708                                     | 0.0563                                     | 1.6411       | 1.6400          |
| 600.00   | 135.6708                                   | 197.0716                                   | 4.9929                                     | 3.9867                                     | 0.0508                                     | 1.4526       | 1.4448          |
| 1000.00  | 195.2386                                   | 250.3074                                   | 1.8298                                     | 1.1651                                     | 0.0043                                     | 1.2821       | 1.2821          |

**Table S6.** Values for H2 in SS01

| pressure<br>[hPa] | loss CH4<br>[nmol mol <sup>-1</sup> yr <sup>-1</sup> ] | prim. prod. H2<br>[nmol mol <sup>-1</sup> yr <sup>-1</sup> ] | prim. loss H2<br>[nmol mol <sup>-1</sup> yr <sup>-1</sup> ] | sec. prod. H2<br>[nmol mol <sup>-1</sup> yr <sup>-1</sup> ] | sec. loss H2<br>[nmol mol <sup>-1</sup> yr <sup>-1</sup> ] | direct yield<br>[-] | effective yield<br>[-] |
|-------------------|--------------------------------------------------------|--------------------------------------------------------------|-------------------------------------------------------------|-------------------------------------------------------------|------------------------------------------------------------|---------------------|------------------------|
| 0.01              | 19.5982                                                | 10.7282                                                      | 4.0564                                                      | 0.0010                                                      | 0.0004                                                     | 1.3848              | 1.3877                 |
| 0.02              | 310.8306                                               | 303.0025                                                     | 100.9256                                                    | 45.4398                                                     | 15.1415                                                    | 1.4426              | 1.4527                 |
| 0.04              | 370.8450                                               | 156.9617                                                     | 89.9165                                                     | 0.0126                                                      | 0.0072                                                     | 1.4294              | 1.4396                 |
| 0.06              | 19.5035                                                | 10.7583                                                      | 3.9832                                                      | 0.0007                                                      | 0.0003                                                     | 1.1287              | 1.0983                 |
| 0.08              | 801.9331                                               | 905.1032                                                     | 136.1367                                                    | 131.6170                                                    | 19.8026                                                    | 0.9748              | 0.7476                 |
| 0.10              | 506.9423                                               | 191.8873                                                     | 125.5017                                                    | 0.0154                                                      | 0.0101                                                     | 0.8949              | 0.5877                 |
| 0.20              | 25.8492                                                | 14.3603                                                      | 4.8739                                                      | 0.0009                                                      | 0.0003                                                     | 0.2053              | 0.0000                 |
| 0.25              | 135.6708                                               | 69.2656                                                      | 18.1339                                                     | 0.4817                                                      | 0.1260                                                     | 0.1786              | 0.0000                 |
| 0.50              | 501.2253                                               | 66.1055                                                      | 66.1049                                                     | 1.3790                                                      | 1.3789                                                     | 0.1319              | 0.0000                 |
| 1.00              | 629.6414                                               | 213.4654                                                     | 156.2828                                                    | 0.0166                                                      | 0.0122                                                     | 0.1311              | 0.0000                 |
| 2.00              | 37.5273                                                | 20.7090                                                      | 6.8870                                                      | 0.0018                                                      | 0.0006                                                     | 0.1833              | 0.0000                 |
| 4.00              | 1561.7603                                              | 2232.4202                                                    | 161.1999                                                    | 190.8134                                                    | 13.7811                                                    | 0.2930              | 0.0475                 |
| 5.00              | 728.7657                                               | 213.5024                                                     | 178.8970                                                    | 0.0169                                                      | 0.0142                                                     | 0.3390              | 0.0908                 |
| 6.00              | 43.2429                                                | 23.9389                                                      | 8.0543                                                      | 0.0034                                                      | 0.0012                                                     | 0.3785              | 0.1310                 |
| 8.00              | 62.0087                                                | 33.4408                                                      | 12.4239                                                     | 0.2475                                                      | 0.0917                                                     | 0.4233              | 0.1808                 |
| 10.00             | 66.8627                                                | 36.3949                                                      | 13.2295                                                     | 0.0076                                                      | 0.0028                                                     | 0.4638              | 0.2276                 |
| 15.00             | 35.6866                                                | 19.4946                                                      | 6.4362                                                      | 0.0898                                                      | 0.0295                                                     | 0.5007              | 0.2748                 |
| 20.00             | 1918.7546                                              | 2767.8999                                                    | 74.9014                                                     | 97.0992                                                     | 2.6284                                                     | 0.5320              | 0.3181                 |
| 30.00             | 246.9136                                               | 44.0994                                                      | 44.0973                                                     | 5.2300                                                      | 5.2297                                                     | 0.5443              | 0.3465                 |
| 40.00             | 28.3674                                                | 15.3265                                                      | 4.7423                                                      | 0.0384                                                      | 0.0118                                                     | 0.5536              | 0.3674                 |
| 50.00             | 190.9330                                               | 39.2001                                                      | 39.1980                                                     | 6.1183                                                      | 6.1180                                                     | 0.5518              | 0.3683                 |
| 60.00             | 967.9515                                               | 177.3884                                                     | 177.3862                                                    | 0.0175                                                      | 0.0175                                                     | 0.5555              | 0.3670                 |
| 80.00             | 97.4300                                                | 51.8297                                                      | 20.8491                                                     | 0.0137                                                      | 0.0055                                                     | 0.5516              | 0.3474                 |
| 90.00             | 25.1002                                                | 13.4666                                                      | 4.1603                                                      | 0.0193                                                      | 0.0059                                                     | 0.5474              | 0.3405                 |
| 100.00            | 1916.4918                                              | 2653.8635                                                    | 19.5267                                                     | 25.4585                                                     | 0.1874                                                     | 0.5422              | 0.3386                 |
| 120.00            | 24.9944                                                | 13.3891                                                      | 4.2216                                                      | 0.0157                                                      | 0.0049                                                     | 0.5351              | 0.3512                 |
| 140.00            | 26.4438                                                | 14.0311                                                      | 4.5558                                                      | 0.0110                                                      | 0.0036                                                     | 0.5340              | 0.3615                 |
| 160.00            | 165.1342                                               | 82.6896                                                      | 37.3158                                                     | 0.0135                                                      | 0.0061                                                     | 0.5306              | 0.3586                 |
| 180.00            | 24.7600                                                | 13.2226                                                      | 4.2787                                                      | 0.0089                                                      | 0.0029                                                     | 0.5357              | 0.3672                 |
| 200.00            | 23.4725                                                | 12.5612                                                      | 4.3206                                                      | 0.0047                                                      | 0.0016                                                     | 0.5365              | 0.3713                 |
| 250.00            | 328.7188                                               | 294.1756                                                     | 122.5368                                                    | 36.9261                                                     | 15.3875                                                    | 0.5403              | 0.3740                 |
| 300.00            | 886.6049                                               | 116.2059                                                     | 116.2046                                                    | 0.3553                                                      | 0.3553                                                     | 0.5463              | 0.3676                 |
| 400.00            | 252.0401                                               | 116.8858                                                     | 59.5354                                                     | 0.0134                                                      | 0.0068                                                     | 0.5393              | 0.3414                 |
| 600.00            | 20.3775                                                | 11.0497                                                      | 4.1502                                                      | 0.0015                                                      | 0.0006                                                     | 0.5105              | 0.3795                 |
| 1000.00           | 195.2386                                               | 107.2068                                                     | 6.6770                                                      | 0.2018                                                      | 0.0126                                                     | 0.5491              | 0.5491                 |

### 3.4 SS02

**Table S7.** Values for H2O in SS02

| pressure | loss CH4                                   | prim. prod. H2O                            | prim. loss H2O                             | sec. prod. H2O                             | sec. loss H2O                              | direct yield | effective yield |
|----------|--------------------------------------------|--------------------------------------------|--------------------------------------------|--------------------------------------------|--------------------------------------------|--------------|-----------------|
| [hPa]    | [nmol mol <sup>-1</sup> yr <sup>-1</sup> ] | [-]          | [-]             |
| 0.01     | 1916.2720                                  | 71.6682                                    | 71.6685                                    | 6.0385                                     | 6.0386                                     | 0.0374       | -0.0000         |
| 0.02     | 1918.1202                                  | 140.5200                                   | 140.5212                                   | 26.9649                                    | 26.9655                                    | 0.0733       | -0.0000         |
| 0.04     | 1558.6752                                  | 274.0238                                   | 274.0450                                   | 137.8101                                   | 137.8266                                   | 0.1758       | -0.0000         |
| 0.06     | 796.4383                                   | 151.2874                                   | 151.3091                                   | 90.7788                                    | 90.7982                                    | 0.1900       | -0.0001         |
| 0.08     | 303.7297                                   | 85.5789                                    | 85.5912                                    | 55.3986                                    | 55.4100                                    | 0.2818       | -0.0001         |
| 0.10     | 318.7704                                   | 115.0628                                   | 115.0802                                   | 75.3997                                    | 75.4150                                    | 0.3610       | -0.0001         |
| 0.20     | 171.9750                                   | 112.5759                                   | 112.5875                                   | 75.9244                                    | 75.9303                                    | 0.6546       | -0.0001         |
| 0.25     | 220.5317                                   | 169.2188                                   | 169.2352                                   | 114.9273                                   | 114.9351                                   | 0.7673       | -0.0001         |
| 0.50     | 437.9152                                   | 429.2071                                   | 429.2343                                   | 322.7821                                   | 322.7906                                   | 0.9801       | -0.0001         |
| 1.00     | 745.2243                                   | 1015.9248                                  | 1015.9476                                  | 1369.2640                                  | 1369.2703                                  | 1.3632       | -0.0000         |
| 2.00     | 791.9167                                   | 1266.1801                                  | 1266.2045                                  | 3017.6399                                  | 3017.6433                                  | 1.5989       | -0.0000         |
| 4.00     | 595.7649                                   | 916.6845                                   | 916.6895                                   | 2269.1021                                  | 2269.0835                                  | 1.5387       | 0.0000          |
| 5.00     | 518.1020                                   | 774.7303                                   | 774.7334                                   | 1901.1782                                  | 1901.1635                                  | 1.4953       | 0.0000          |
| 6.00     | 418.4800                                   | 600.0106                                   | 600.0101                                   | 1434.5537                                  | 1434.5374                                  | 1.4338       | 0.0000          |
| 8.00     | 307.9801                                   | 425.0742                                   | 425.0761                                   | 1000.9892                                  | 1000.9828                                  | 1.3802       | 0.0000          |
| 10.00    | 207.5064                                   | 262.7709                                   | 262.7739                                   | 524.3085                                   | 524.3049                                   | 1.2663       | 0.0000          |
| 15.00    | 133.0469                                   | 157.0328                                   | 157.0344                                   | 273.2870                                   | 273.2207                                   | 1.1803       | 0.0005          |
| 20.00    | 75.3339                                    | 81.4447                                    | 81.4341                                    | 119.1172                                   | 117.8388                                   | 1.0811       | 0.0171          |
| 30.00    | 48.7168                                    | 56.8910                                    | 56.3587                                    | 89.5712                                    | 80.8718                                    | 1.1678       | 0.1895          |
| 40.00    | 28.6339                                    | 37.0780                                    | 32.3809                                    | 50.2396                                    | 32.2129                                    | 1.2949       | 0.7936          |
| 50.00    | 23.1527                                    | 32.4973                                    | 21.1383                                    | 33.1306                                    | 15.3641                                    | 1.4036       | 1.2580          |
| 60.00    | 13.3260                                    | 19.4221                                    | 6.7207                                     | 8.6247                                     | 1.9326                                     | 1.4575       | 1.4553          |
| 80.00    | 7.1377                                     | 10.8839                                    | 1.5133                                     | 1.6607                                     | 0.1417                                     | 1.5248       | 1.5256          |
| 90.00    | 6.1959                                     | 9.6328                                     | 0.9366                                     | 0.9998                                     | 0.0601                                     | 1.5547       | 1.5552          |
| 100.00   | 5.6798                                     | 8.9551                                     | 0.6117                                     | 0.6380                                     | 0.0272                                     | 1.5767       | 1.5765          |
| 120.00   | 5.5468                                     | 8.6794                                     | 0.4044                                     | 0.4093                                     | 0.0111                                     | 1.5648       | 1.5637          |
| 140.00   | 5.5150                                     | 8.5917                                     | 0.3578                                     | 0.3664                                     | 0.0080                                     | 1.5579       | 1.5580          |
| 160.00   | 5.8216                                     | 9.0815                                     | 0.3878                                     | 0.3997                                     | 0.0088                                     | 1.5600       | 1.5605          |
| 180.00   | 5.4489                                     | 8.4631                                     | 0.3441                                     | 0.3569                                     | 0.0072                                     | 1.5532       | 1.5542          |
| 200.00   | 5.4595                                     | 8.4193                                     | 0.3467                                     | 0.3580                                     | 0.0073                                     | 1.5421       | 1.5429          |
| 250.00   | 6.1053                                     | 9.3020                                     | 0.3811                                     | 0.3888                                     | 0.0079                                     | 1.5236       | 1.5236          |
| 300.00   | 7.5580                                     | 11.5624                                    | 0.4365                                     | 0.4453                                     | 0.0084                                     | 1.5298       | 1.5299          |
| 400.00   | 12.8731                                    | 19.9701                                    | 0.6713                                     | 0.6792                                     | 0.0114                                     | 1.5513       | 1.5510          |
| 600.00   | 27.7802                                    | 35.3341                                    | 0.8982                                     | 0.6934                                     | 0.0089                                     | 1.2719       | 1.2642          |
| 1000.00  | 39.5131                                    | 43.5487                                    | 0.3195                                     | 0.1916                                     | 0.0007                                     | 1.1021       | 1.1021          |

**Table S8.** Values for H2 in SS02

| pressure<br>[hPa] | loss CH4<br>[nmol mol-1 yr-1] | prim. prod. H2<br>[nmol mol-1 yr-1] | prim. loss H2<br>[nmol mol-1 yr-1] | sec. prod. H2<br>[nmol mol-1 yr-1] | sec. loss H2<br>[nmol mol-1 yr-1] | direct yield<br>[-] | effective yield<br>[-] |
|-------------------|-------------------------------|-------------------------------------|------------------------------------|------------------------------------|-----------------------------------|---------------------|------------------------|
| 0.01              | 6.1959                        | 3.6576                              | 1.0579                             | 0.0003                             | 0.0001                            | 0.9940              | 0.9606                 |
| 0.02              | 303.7297                      | 256.4054                            | 78.9012                            | 2.4025                             | 0.7397                            | 1.0017              | 0.9212                 |
| 0.04              | 307.9801                      | 153.9385                            | 72.1560                            | 0.1105                             | 0.0518                            | 1.0056              | 0.9410                 |
| 0.06              | 7.1377                        | 4.2297                              | 1.1327                             | 0.0002                             | 0.0000                            | 0.9568              | 0.8377                 |
| 0.08              | 796.4383                      | 762.0050                            | 100.1964                           | 6.1796                             | 0.8129                            | 0.8442              | 0.5899                 |
| 0.10              | 418.4800                      | 191.9428                            | 101.1732                           | 0.1076                             | 0.0567                            | 0.8028              | 0.5123                 |
| 0.20              | 13.3260                       | 7.9742                              | 1.8073                             | 0.0007                             | 0.0001                            | 0.1757              | 0.0000                 |
| 0.25              | 27.7802                       | 17.6233                             | 2.5444                             | 0.0938                             | 0.0135                            | 0.1613              | 0.0000                 |
| 0.50              | 437.9151                      | 59.8329                             | 59.8324                            | 0.0749                             | 0.0749                            | 0.1366              | 0.0000                 |
| 1.00              | 518.1020                      | 218.0794                            | 127.5337                           | 0.1044                             | 0.0611                            | 0.1432              | 0.0000                 |
| 2.00              | 23.1527                       | 13.8732                             | 3.2202                             | 0.0040                             | 0.0008                            | 0.2179              | 0.0003                 |
| 4.00              | 1558.6752                     | 1567.3640                           | 114.1221                           | 14.5478                            | 1.0596                            | 0.3710              | 0.1228                 |
| 5.00              | 595.7649                      | 221.0570                            | 147.8984                           | 0.0800                             | 0.0535                            | 0.4209              | 0.1748                 |
| 6.00              | 28.6339                       | 17.1913                             | 4.2225                             | 0.0130                             | 0.0028                            | 0.4587              | 0.2170                 |
| 8.00              | 12.8731                       | 7.9488                              | 2.1490                             | 0.0479                             | 0.0129                            | 0.4998              | 0.2657                 |
| 10.00             | 48.7168                       | 29.0460                             | 8.3007                             | 0.0431                             | 0.0120                            | 0.5335              | 0.3092                 |
| 15.00             | 7.5580                        | 4.6381                              | 1.0647                             | 0.0179                             | 0.0041                            | 0.5648              | 0.3539                 |
| 20.00             | 1918.1202                     | 1921.3562                           | 167.9019                           | 14.8349                            | 1.2966                            | 0.5869              | 0.3939                 |
| 30.00             | 220.5317                      | 35.5822                             | 35.5805                            | 0.2767                             | 0.2767                            | 0.5962              | 0.4265                 |
| 40.00             | 6.1053                        | 3.6890                              | 0.7878                             | 0.0079                             | 0.0016                            | 0.6004              | 0.4533                 |
| 50.00             | 171.9750                      | 30.2167                             | 30.2149                            | 0.3197                             | 0.3197                            | 0.5992              | 0.4603                 |
| 60.00             | 791.9167                      | 172.5675                            | 172.3449                           | 0.0210                             | 0.0210                            | 0.5984              | 0.4628                 |
| 80.00             | 75.3339                       | 44.2103                             | 14.5768                            | 0.0655                             | 0.0215                            | 0.5926              | 0.4339                 |
| 90.00             | 5.4595                        | 3.2631                              | 0.7050                             | 0.0040                             | 0.0008                            | 0.5903              | 0.4196                 |
| 100.00            | 1916.2720                     | 1904.8350                           | 72.4220                            | 8.6097                             | 0.3274                            | 0.5875              | 0.4132                 |
| 120.00            | 5.4489                        | 3.2465                              | 0.7198                             | 0.0032                             | 0.0007                            | 0.5884              | 0.4355                 |
| 140.00            | 5.8216                        | 3.4436                              | 0.7876                             | 0.0023                             | 0.0005                            | 0.5917              | 0.4557                 |
| 160.00            | 133.0469                      | 75.1441                             | 28.1136                            | 0.0936                             | 0.0350                            | 0.5915              | 0.4565                 |
| 180.00            | 5.5150                        | 3.2631                              | 0.7514                             | 0.0019                             | 0.0004                            | 0.5958              | 0.4642                 |
| 200.00            | 5.5468                        | 3.2639                              | 0.8491                             | 0.0011                             | 0.0002                            | 0.5977              | 0.4691                 |
| 250.00            | 318.7704                      | 255.9192                            | 93.9760                            | 2.1778                             | 0.8001                            | 0.6042              | 0.4762                 |
| 300.00            | 745.2243                      | 106.7504                            | 106.7494                           | 0.0294                             | 0.0294                            | 0.6137              | 0.4746                 |
| 400.00            | 207.5064                      | 110.7126                            | 46.6048                            | 0.0972                             | 0.0409                            | 0.6175              | 0.4533                 |
| 600.00            | 5.6798                        | 3.3371                              | 0.9907                             | 0.0004                             | 0.0001                            | 0.6344              | 0.5457                 |
| 1000.00           | 39.5131                       | 26.7624                             | 0.5844                             | 0.0343                             | 0.0007                            | 0.6773              | 0.6773                 |

### 3.5 SS03

**Table S9.** Values for H2O in SS03

| pressure | loss CH4          | prim. prod. H2O   | prim. loss H2O    | sec. prod. H2O    | sec. loss H2O     | direct yield | effective yield |
|----------|-------------------|-------------------|-------------------|-------------------|-------------------|--------------|-----------------|
| [hPa]    | [nmol mol-1 yr-1] | [-]          | [-]             |
| 0.01     | 1916.2512         | 57.2777           | 57.2778           | 1.8267            | 1.8267            | 0.0299       | -0.0000         |
| 0.02     | 1918.0458         | 87.5657           | 87.5662           | 7.9537            | 7.9539            | 0.0457       | -0.0000         |
| 0.04     | 1558.2920         | 123.4414          | 123.4480          | 36.1690           | 36.1730           | 0.0792       | -0.0000         |
| 0.06     | 795.7528          | 71.7501           | 71.7554           | 27.3894           | 27.3944           | 0.0902       | -0.0000         |
| 0.08     | 302.8428          | 39.3191           | 39.3219           | 17.7565           | 17.7599           | 0.1298       | -0.0000         |
| 0.10     | 317.5275          | 53.4506           | 53.4551           | 25.2578           | 25.2627           | 0.1683       | -0.0000         |
| 0.20     | 169.6055          | 64.5030           | 64.5095           | 32.6402           | 32.6428           | 0.3803       | -0.0001         |
| 0.25     | 217.2341          | 104.5519          | 104.5620          | 53.1251           | 53.1287           | 0.4813       | -0.0001         |
| 0.50     | 430.0014          | 335.0852          | 335.1062          | 213.0798          | 213.0844          | 0.7793       | -0.0001         |
| 1.00     | 727.5515          | 941.6185          | 941.6392          | 1214.5675         | 1214.5709         | 1.2942       | -0.0000         |
| 2.00     | 769.9118          | 1211.2266         | 1211.2478         | 2661.9041         | 2661.8967         | 1.5732       | -0.0000         |
| 4.00     | 579.1397          | 825.4896          | 825.4860          | 1580.2598         | 1580.2368         | 1.4254       | 0.0000          |
| 5.00     | 504.1595          | 675.0144          | 675.0089          | 1244.2352         | 1244.2170         | 1.3389       | 0.0000          |
| 6.00     | 407.4222          | 512.9369          | 512.9288          | 925.4190          | 925.3988          | 1.2590       | 0.0001          |
| 8.00     | 300.1220          | 352.5341          | 352.5305          | 601.4781          | 601.4671          | 1.1746       | 0.0000          |
| 10.00    | 201.9397          | 213.1851          | 213.1843          | 307.6684          | 307.6629          | 1.0557       | 0.0000          |
| 15.00    | 129.0360          | 124.8427          | 124.8415          | 158.4200          | 158.4015          | 0.9675       | 0.0002          |
| 20.00    | 72.5719           | 66.9920           | 66.9815           | 78.9570           | 78.2788           | 0.9231       | 0.0095          |
| 30.00    | 46.4485           | 47.9700           | 47.5188           | 64.3708           | 58.4597           | 1.0328       | 0.1370          |
| 40.00    | 26.8078           | 32.0249           | 27.9635           | 39.6048           | 25.4780           | 1.1946       | 0.6785          |
| 50.00    | 21.3558           | 27.7330           | 20.9989           | 30.2864           | 15.2236           | 1.2986       | 1.0207          |
| 60.00    | 11.7606           | 16.1610           | 7.1338            | 9.1856            | 2.2850            | 1.3742       | 1.3543          |
| 80.00    | 5.5920            | 8.0734            | 1.3492            | 1.4911            | 0.1362            | 1.4437       | 1.4448          |
| 90.00    | 4.5206            | 6.6723            | 0.7857            | 0.8441            | 0.0545            | 1.4760       | 1.4768          |
| 100.00   | 3.8426            | 5.7989            | 0.4829            | 0.5077            | 0.0233            | 1.5091       | 1.5095          |
| 120.00   | 3.3060            | 5.0731            | 0.2696            | 0.2772            | 0.0078            | 1.5345       | 1.5344          |
| 140.00   | 3.1093            | 4.7770            | 0.2094            | 0.2183            | 0.0048            | 1.5363       | 1.5376          |
| 160.00   | 3.2439            | 4.9958            | 0.2214            | 0.2320            | 0.0051            | 1.5401       | 1.5418          |
| 180.00   | 3.0058            | 4.6256            | 0.1891            | 0.1993            | 0.0040            | 1.5389       | 1.5409          |
| 200.00   | 3.0044            | 4.5947            | 0.1898            | 0.1990            | 0.0041            | 1.5293       | 1.5310          |
| 250.00   | 3.3225            | 5.0194            | 0.2068            | 0.2140            | 0.0044            | 1.5107       | 1.5116          |
| 300.00   | 4.0419            | 6.1209            | 0.2329            | 0.2407            | 0.0045            | 1.5144       | 1.5152          |
| 400.00   | 6.7311            | 10.2797           | 0.3489            | 0.3567            | 0.0060            | 1.5272       | 1.5274          |
| 600.00   | 14.2938           | 17.7077           | 0.4518            | 0.3515            | 0.0045            | 1.2388       | 1.2315          |
| 1000.00  | 20.0473           | 21.4133           | 0.1571            | 0.0932            | 0.0003            | 1.0681       | 1.0681          |

**Table S10.** Values for H2 in SS03

| pressure<br>[hPa] | loss CH4<br>[nmol mol-1 yr-1] | prim. prod. H2<br>[nmol mol-1 yr-1] | prim. loss H2<br>[nmol mol-1 yr-1] | sec. prod. H2<br>[nmol mol-1 yr-1] | sec. loss H2<br>[nmol mol-1 yr-1] | direct yield<br>[-] | effective yield<br>[-] |
|-------------------|-------------------------------|-------------------------------------|------------------------------------|------------------------------------|-----------------------------------|---------------------|------------------------|
| 0.01              | 4.5206                        | 2.7055                              | 0.6576                             | 0.0002                             | 0.0000                            | 0.9759              | 0.9307                 |
| 0.02              | 302.8428                      | 254.2942                            | 76.2837                            | 0.7793                             | 0.2339                            | 0.9740              | 0.8822                 |
| 0.04              | 300.1220                      | 153.8022                            | 69.7075                            | 0.0881                             | 0.0399                            | 0.9838              | 0.9185                 |
| 0.06              | 5.5920                        | 3.3557                              | 0.7478                             | 0.0002                             | 0.0000                            | 0.9490              | 0.8316                 |
| 0.08              | 795.7528                      | 755.1970                            | 95.2530                            | 2.0687                             | 0.2610                            | 0.8397              | 0.5896                 |
| 0.10              | 407.4222                      | 192.4424                            | 97.7455                            | 0.0869                             | 0.0441                            | 0.8001              | 0.5161                 |
| 0.20              | 11.7606                       | 7.1185                              | 1.3961                             | 0.0007                             | 0.0001                            | 0.1752              | 0.0000                 |
| 0.25              | 14.2938                       | 9.4509                              | 0.9724                             | 0.0416                             | 0.0043                            | 0.1613              | 0.0000                 |
| 0.50              | 430.0013                      | 59.1531                             | 59.1527                            | 0.0253                             | 0.0253                            | 0.1376              | 0.0000                 |
| 1.00              | 504.1595                      | 219.4490                            | 123.3854                           | 0.0840                             | 0.0472                            | 0.1450              | 0.0000                 |
| 2.00              | 21.3558                       | 12.9492                             | 2.7320                             | 0.0042                             | 0.0008                            | 0.2235              | 0.0013                 |
| 4.00              | 1558.2920                     | 1533.0311                           | 106.1287                           | 4.6379                             | 0.3212                            | 0.3849              | 0.1377                 |
| 5.00              | 579.1397                      | 222.9308                            | 143.2322                           | 0.0659                             | 0.0423                            | 0.4353              | 0.1906                 |
| 6.00              | 26.8078                       | 16.2802                             | 3.7144                             | 0.0108                             | 0.0022                            | 0.4723              | 0.2325                 |
| 8.00              | 6.7311                        | 4.2638                              | 0.9576                             | 0.0238                             | 0.0053                            | 0.5125              | 0.2804                 |
| 10.00             | 46.4485                       | 28.0440                             | 7.6498                             | 0.0319                             | 0.0085                            | 0.5445              | 0.3225                 |
| 15.00             | 4.0419                        | 2.5446                              | 0.4937                             | 0.0101                             | 0.0018                            | 0.5744              | 0.3663                 |
| 20.00             | 1918.0458                     | 1868.2346                           | 180.3870                           | 4.8048                             | 0.4640                            | 0.5949              | 0.4058                 |
| 30.00             | 217.2341                      | 35.0426                             | 35.0409                            | 0.0849                             | 0.0849                            | 0.6038              | 0.4396                 |
| 40.00             | 3.3225                        | 2.0552                              | 0.3780                             | 0.0048                             | 0.0007                            | 0.6073              | 0.4691                 |
| 50.00             | 169.6055                      | 29.7069                             | 29.7051                            | 0.0977                             | 0.0977                            | 0.6064              | 0.4786                 |
| 60.00             | 769.9118                      | 172.1023                            | 171.1051                           | 0.0162                             | 0.0161                            | 0.6053              | 0.4866                 |
| 80.00             | 72.5719                       | 43.1702                             | 13.7555                            | 0.0483                             | 0.0153                            | 0.6001              | 0.4664                 |
| 90.00             | 3.0044                        | 1.8339                              | 0.3460                             | 0.0025                             | 0.0004                            | 0.5985              | 0.4530                 |
| 100.00            | 1916.2512                     | 1869.9966                           | 88.8331                            | 2.3706                             | 0.1126                            | 0.5962              | 0.4446                 |
| 120.00            | 3.0058                        | 1.8270                              | 0.3537                             | 0.0020                             | 0.0003                            | 0.5984              | 0.4618                 |
| 140.00            | 3.2439                        | 1.9560                              | 0.3879                             | 0.0014                             | 0.0002                            | 0.6025              | 0.4821                 |
| 160.00            | 129.0360                      | 74.1222                             | 26.8961                            | 0.0703                             | 0.0255                            | 0.6030              | 0.4838                 |
| 180.00            | 3.1093                        | 1.8733                              | 0.3754                             | 0.0011                             | 0.0002                            | 0.6078              | 0.4907                 |
| 200.00            | 3.3060                        | 1.9783                              | 0.4522                             | 0.0007                             | 0.0001                            | 0.6104              | 0.4960                 |
| 250.00            | 317.5275                      | 254.0694                            | 90.6481                            | 0.6981                             | 0.2492                            | 0.6186              | 0.5060                 |
| 300.00            | 727.5515                      | 105.5051                            | 105.5040                           | 0.0125                             | 0.0125                            | 0.6296              | 0.5095                 |
| 400.00            | 201.9397                      | 109.9502                            | 44.8696                            | 0.0760                             | 0.0310                            | 0.6334              | 0.4939                 |
| 600.00            | 3.8426                        | 2.2911                              | 0.5828                             | 0.0003                             | 0.0000                            | 0.6612              | 0.5958                 |
| 1000.00           | 20.0473                       | 13.9727                             | 0.1841                             | 0.0120                             | 0.0002                            | 0.6970              | 0.6970                 |

### 3.6 SS04

**Table S11.** Values for H<sub>2</sub>O in SS04

| pressure | loss CH <sub>4</sub>                       | prim. prod. H <sub>2</sub> O               | prim. loss H <sub>2</sub> O                | sec. prod. H <sub>2</sub> O                | sec. loss H <sub>2</sub> O                 | direct yield | effective yield |
|----------|--------------------------------------------|--------------------------------------------|--------------------------------------------|--------------------------------------------|--------------------------------------------|--------------|-----------------|
| [hPa]    | [nmol mol <sup>-1</sup> yr <sup>-1</sup> ] | [-]          | [-]             |
| 0.01     | 1916.2366                                  | 48.3526                                    | 48.3526                                    | 0.2489                                     | 0.2489                                     | 0.0252       | 0.0000          |
| 0.02     | 1917.9882                                  | 53.1589                                    | 53.1590                                    | 0.9566                                     | 0.9566                                     | 0.0277       | -0.0000         |
| 0.04     | 1557.9861                                  | 51.7857                                    | 51.7856                                    | 3.8459                                     | 3.8461                                     | 0.0332       | -0.0000         |
| 0.06     | 795.2046                                   | 30.3480                                    | 30.3459                                    | 3.3050                                     | 3.3054                                     | 0.0382       | 0.0000          |
| 0.08     | 302.1334                                   | 13.8428                                    | 13.8409                                    | 2.2613                                     | 2.2616                                     | 0.0458       | 0.0000          |
| 0.10     | 316.5334                                   | 18.8425                                    | 18.8407                                    | 3.6429                                     | 3.6434                                     | 0.0595       | 0.0000          |
| 0.20     | 167.7099                                   | 29.3744                                    | 29.3772                                    | 7.2611                                     | 7.2616                                     | 0.1752       | -0.0000         |
| 0.25     | 214.5961                                   | 54.8070                                    | 54.8120                                    | 14.0636                                    | 14.0643                                    | 0.2554       | -0.0000         |
| 0.50     | 423.6704                                   | 263.3580                                   | 263.3736                                   | 123.9371                                   | 123.9378                                   | 0.6216       | -0.0000         |
| 1.00     | 713.4132                                   | 773.1735                                   | 773.1869                                   | 852.8061                                   | 852.8029                                   | 1.0838       | -0.0000         |
| 2.00     | 752.3080                                   | 1027.5138                                  | 1027.5266                                  | 1460.9475                                  | 1460.9363                                  | 1.3658       | -0.0000         |
| 4.00     | 565.8395                                   | 631.4210                                   | 631.4160                                   | 662.0550                                   | 662.0446                                   | 1.1159       | 0.0000          |
| 5.00     | 493.0054                                   | 506.3616                                   | 506.3548                                   | 483.8403                                   | 483.8313                                   | 1.0271       | 0.0000          |
| 6.00     | 398.5758                                   | 376.5226                                   | 376.5156                                   | 341.3628                                   | 341.3551                                   | 0.9447       | 0.0000          |
| 8.00     | 293.8355                                   | 248.3343                                   | 248.3288                                   | 220.6348                                   | 220.6301                                   | 0.8451       | 0.0000          |
| 10.00    | 197.4863                                   | 147.3645                                   | 147.3624                                   | 120.3364                                   | 120.3341                                   | 0.7462       | 0.0000          |
| 15.00    | 125.8273                                   | 90.6617                                    | 90.6598                                    | 73.9790                                    | 73.9770                                    | 0.7205       | 0.0000          |
| 20.00    | 70.3623                                    | 55.0466                                    | 55.0421                                    | 51.1527                                    | 50.9635                                    | 0.7823       | 0.0028          |
| 30.00    | 44.6339                                    | 44.1734                                    | 43.8080                                    | 51.6834                                    | 48.5821                                    | 0.9897       | 0.0777          |
| 40.00    | 25.3469                                    | 30.3590                                    | 26.5857                                    | 36.8204                                    | 24.5355                                    | 1.1977       | 0.6335          |
| 50.00    | 19.9184                                    | 25.6550                                    | 19.4495                                    | 28.2637                                    | 14.2466                                    | 1.2880       | 1.0153          |
| 60.00    | 10.5083                                    | 14.1728                                    | 6.3425                                     | 8.1197                                     | 2.0370                                     | 1.3487       | 1.3240          |
| 80.00    | 4.3554                                     | 5.9845                                     | 1.0875                                     | 1.1993                                     | 0.1126                                     | 1.3740       | 1.3739          |
| 90.00    | 3.1804                                     | 4.3876                                     | 0.5694                                     | 0.6111                                     | 0.0406                                     | 1.3796       | 1.3799          |
| 100.00   | 2.3728                                     | 3.3100                                     | 0.3054                                     | 0.3207                                     | 0.0152                                     | 1.3950       | 1.3950          |
| 120.00   | 1.5135                                     | 2.2215                                     | 0.1260                                     | 0.1297                                     | 0.0037                                     | 1.4678       | 1.4678          |
| 140.00   | 1.1848                                     | 1.7510                                     | 0.0779                                     | 0.0812                                     | 0.0018                                     | 1.4779       | 1.4791          |
| 160.00   | 1.1817                                     | 1.7540                                     | 0.0779                                     | 0.0816                                     | 0.0018                                     | 1.4843       | 1.4860          |
| 180.00   | 1.0512                                     | 1.5710                                     | 0.0639                                     | 0.0676                                     | 0.0014                                     | 1.4945       | 1.4967          |
| 200.00   | 1.0404                                     | 1.5519                                     | 0.0639                                     | 0.0675                                     | 0.0014                                     | 1.4917       | 1.4939          |
| 250.00   | 1.0963                                     | 1.6259                                     | 0.0669                                     | 0.0704                                     | 0.0014                                     | 1.4831       | 1.4850          |
| 300.00   | 1.2291                                     | 1.8265                                     | 0.0697                                     | 0.0734                                     | 0.0014                                     | 1.4861       | 1.4880          |
| 400.00   | 1.8176                                     | 2.6961                                     | 0.0924                                     | 0.0960                                     | 0.0016                                     | 1.4834       | 1.4844          |
| 600.00   | 3.5047                                     | 4.3036                                     | 0.1106                                     | 0.0913                                     | 0.0012                                     | 1.2280       | 1.2221          |
| 1000.00  | 4.4746                                     | 4.7488                                     | 0.0348                                     | 0.0215                                     | 0.0001                                     | 1.0613       | 1.0613          |

**Table S12.** Values for H2 in SS04

| pressure<br>[hPa] | loss CH4<br>[nmol mol-1 yr-1] | prim. prod. H2<br>[nmol mol-1 yr-1] | prim. loss H2<br>[nmol mol-1 yr-1] | sec. prod. H2<br>[nmol mol-1 yr-1] | sec. loss H2<br>[nmol mol-1 yr-1] | direct yield<br>[-] | effective yield<br>[-] |
|-------------------|-------------------------------|-------------------------------------|------------------------------------|------------------------------------|-----------------------------------|---------------------|------------------------|
| 0.01              | 3.1804                        | 1.9315                              | 0.3174                             | 0.0001                             | 0.0000                            | 0.9630              | 0.9132                 |
| 0.02              | 302.1334                      | 253.3274                            | 74.2472                            | 0.1032                             | 0.0303                            | 0.9537              | 0.8597                 |
| 0.04              | 293.8355                      | 153.7450                            | 67.7178                            | 0.0668                             | 0.0294                            | 0.9737              | 0.9103                 |
| 0.06              | 4.3554                        | 2.6463                              | 0.4220                             | 0.0001                             | 0.0000                            | 0.9457              | 0.8313                 |
| 0.08              | 795.2046                      | 752.0619                            | 91.2984                            | 0.3236                             | 0.0393                            | 0.8385              | 0.5930                 |
| 0.10              | 398.5758                      | 192.9511                            | 94.9457                            | 0.0652                             | 0.0321                            | 0.8000              | 0.5220                 |
| 0.20              | 10.5083                       | 6.4240                              | 1.0569                             | 0.0004                             | 0.0000                            | 0.1753              | 0.0000                 |
| 0.25              | 3.5047                        | 2.5253                              | 0.0906                             | 0.0065                             | 0.0002                            | 0.1617              | 0.0000                 |
| 0.50              | 423.6704                      | 58.6296                             | 58.6291                            | 0.0041                             | 0.0041                            | 0.1384              | 0.0000                 |
| 1.00              | 493.0054                      | 220.7265                            | 119.9782                           | 0.0608                             | 0.0331                            | 0.1465              | 0.0000                 |
| 2.00              | 19.9184                       | 12.1983                             | 2.3341                             | 0.0025                             | 0.0004                            | 0.2283              | 0.0038                 |
| 4.00              | 1557.9861                     | 1517.0623                           | 99.4865                            | 0.7424                             | 0.0487                            | 0.3970              | 0.1507                 |
| 5.00              | 565.8395                      | 224.6447                            | 139.3690                           | 0.0447                             | 0.0278                            | 0.4477              | 0.2044                 |
| 6.00              | 25.3469                       | 15.5400                             | 3.3024                             | 0.0066                             | 0.0013                            | 0.4841              | 0.2460                 |
| 8.00              | 1.8176                        | 1.2351                              | 0.1743                             | 0.0082                             | 0.0008                            | 0.5232              | 0.2929                 |
| 10.00             | 44.6339                       | 27.2284                             | 7.1241                             | 0.0212                             | 0.0054                            | 0.5537              | 0.3338                 |
| 15.00             | 1.2291                        | 0.8340                              | 0.1089                             | 0.0049                             | 0.0003                            | 0.5825              | 0.3768                 |
| 20.00             | 1917.9882                     | 1829.2559                           | 180.9671                           | 0.6790                             | 0.0672                            | 0.6015              | 0.4158                 |
| 30.00             | 214.5961                      | 34.6965                             | 34.6948                            | 0.0094                             | 0.0094                            | 0.6100              | 0.4508                 |
| 40.00             | 1.0963                        | 0.7194                              | 0.0925                             | 0.0026                             | 0.0002                            | 0.6131              | 0.4830                 |
| 50.00             | 167.7099                      | 29.3994                             | 29.3977                            | 0.0103                             | 0.0103                            | 0.6124              | 0.4953                 |
| 60.00             | 752.3079                      | 171.7689                            | 168.8842                           | 0.0106                             | 0.0104                            | 0.6113              | 0.5108                 |
| 80.00             | 70.3623                       | 42.3230                             | 13.0886                            | 0.0336                             | 0.0104                            | 0.6076              | 0.5107                 |
| 90.00             | 1.0404                        | 0.6640                              | 0.0888                             | 0.0014                             | 0.0001                            | 0.6073              | 0.5075                 |
| 100.00            | 1916.2366                     | 1845.2938                           | 95.5194                            | 0.2271                             | 0.0118                            | 0.6065              | 0.5062                 |
| 120.00            | 1.0512                        | 0.6645                              | 0.0905                             | 0.0011                             | 0.0001                            | 0.6123              | 0.5205                 |
| 140.00            | 1.1817                        | 0.7356                              | 0.1000                             | 0.0007                             | 0.0000                            | 0.6202              | 0.5364                 |
| 160.00            | 125.8273                      | 73.2914                             | 25.9123                            | 0.0501                             | 0.0177                            | 0.6226              | 0.5384                 |
| 180.00            | 1.1848                        | 0.7348                              | 0.0998                             | 0.0005                             | 0.0000                            | 0.6321              | 0.5470                 |
| 200.00            | 1.5135                        | 0.9267                              | 0.1393                             | 0.0003                             | 0.0000                            | 0.6383              | 0.5542                 |
| 250.00            | 316.5334                      | 253.2272                            | 88.0590                            | 0.0901                             | 0.0313                            | 0.6562              | 0.5741                 |
| 300.00            | 713.4131                      | 104.5050                            | 104.5040                           | 0.0035                             | 0.0035                            | 0.6785              | 0.5936                 |
| 400.00            | 197.4863                      | 109.3427                            | 43.4643                            | 0.0566                             | 0.0225                            | 0.6795              | 0.5877                 |
| 600.00            | 2.3728                        | 1.4391                              | 0.2381                             | 0.0001                             | 0.0000                            | 0.7206              | 0.6965                 |
| 1000.00           | 4.4746                        | 3.1576                              | 0.0118                             | 0.0008                             | 0.0000                            | 0.7057              | 0.7057                 |

### 3.7 SS05

**Table S13.** Values for H2O in SS05

| pressure | loss CH4                                   | prim. prod. H2O                            | prim. loss H2O                             | sec. prod. H2O                             | sec. loss H2O                              | direct yield | effective yield |
|----------|--------------------------------------------|--------------------------------------------|--------------------------------------------|--------------------------------------------|--------------------------------------------|--------------|-----------------|
| [hPa]    | [nmol mol <sup>-1</sup> yr <sup>-1</sup> ] | [-]          | [-]             |
| 0.01     | 1917.4506                                  | 1152.0941                                  | 972.0172                                   | 1046.6910                                  | 882.7494                                   | 0.6008       | 0.1794          |
| 0.02     | 1921.2894                                  | 1354.5757                                  | 1070.4066                                  | 1406.5293                                  | 1111.1105                                  | 0.7050       | 0.3017          |
| 0.04     | 1573.4655                                  | 1532.7096                                  | 1091.6971                                  | 2516.4966                                  | 1792.7393                                  | 0.9741       | 0.7403          |
| 0.06     | 822.6463                                   | 926.9048                                   | 703.9893                                   | 2259.4878                                  | 1715.9041                                  | 1.1267       | 0.9317          |
| 0.08     | 337.5310                                   | 460.2191                                   | 366.2959                                   | 1504.2253                                  | 1197.1858                                  | 1.3635       | 1.1879          |
| 0.10     | 366.0978                                   | 546.7259                                   | 409.6069                                   | 1491.9966                                  | 1117.6855                                  | 1.4934       | 1.3970          |
| 0.20     | 262.0522                                   | 524.1026                                   | 392.2722                                   | 1558.7915                                  | 1166.5212                                  | 2.0000       | 2.0000          |
| 0.25     | 345.8707                                   | 691.7394                                   | 449.8824                                   | 1286.3845                                  | 836.5033                                   | 2.0000       | 2.0000          |
| 0.50     | 738.6408                                   | 1477.2809                                  | 599.7045                                   | 1009.5035                                  | 409.7992                                   | 2.0000       | 2.0000          |
| 1.00     | 1416.7443                                  | 2833.4866                                  | 463.3571                                   | 553.9648                                   | 90.6077                                    | 2.0000       | 2.0000          |
| 2.00     | 1628.0342                                  | 3256.0657                                  | 222.6417                                   | 238.9948                                   | 16.3530                                    | 2.0000       | 2.0000          |
| 4.00     | 1227.4987                                  | 2454.9949                                  | 125.3499                                   | 132.0970                                   | 6.7471                                     | 2.0000       | 2.0000          |
| 5.00     | 1047.9014                                  | 2088.6077                                  | 92.5751                                    | 96.8693                                    | 4.2943                                     | 1.9931       | 1.9931          |
| 6.00     | 838.6682                                   | 1656.2070                                  | 65.8576                                    | 68.5848                                    | 2.7274                                     | 1.9748       | 1.9748          |
| 8.00     | 606.5847                                   | 1176.4484                                  | 37.9511                                    | 39.2159                                    | 1.2651                                     | 1.9395       | 1.9395          |
| 10.00    | 419.0400                                   | 796.2705                                   | 26.2306                                    | 27.1237                                    | 0.8935                                     | 1.9002       | 1.9002          |
| 15.00    | 285.4608                                   | 530.5683                                   | 15.0735                                    | 15.5137                                    | 0.4407                                     | 1.8586       | 1.8586          |
| 20.00    | 180.2899                                   | 327.6204                                   | 9.6982                                     | 9.9933                                     | 0.2958                                     | 1.8172       | 1.8172          |
| 30.00    | 134.9099                                   | 241.5629                                   | 4.8993                                     | 5.0004                                     | 0.1014                                     | 1.7905       | 1.7905          |
| 40.00    | 98.0266                                    | 173.2125                                   | 2.5217                                     | 2.5591                                     | 0.0373                                     | 1.7670       | 1.7670          |
| 50.00    | 91.4322                                    | 161.4018                                   | 1.5766                                     | 1.5925                                     | 0.0156                                     | 1.7653       | 1.7653          |
| 60.00    | 72.8114                                    | 127.7538                                   | 0.9169                                     | 0.9238                                     | 0.0066                                     | 1.7546       | 1.7546          |
| 80.00    | 65.8750                                    | 115.8137                                   | 0.4866                                     | 0.4817                                     | 0.0020                                     | 1.7581       | 1.7580          |
| 90.00    | 69.8565                                    | 123.3021                                   | 0.3946                                     | 0.3754                                     | 0.0012                                     | 1.7651       | 1.7648          |
| 100.00   | 75.4939                                    | 133.6683                                   | 0.3474                                     | 0.2987                                     | 0.0008                                     | 1.7706       | 1.7699          |
| 120.00   | 90.6941                                    | 160.6455                                   | 0.5402                                     | 0.3680                                     | 0.0012                                     | 1.7713       | 1.7694          |
| 140.00   | 96.9287                                    | 171.2260                                   | 1.1373                                     | 0.8407                                     | 0.0056                                     | 1.7665       | 1.7634          |
| 160.00   | 103.7765                                   | 183.7637                                   | 1.6952                                     | 1.3575                                     | 0.0124                                     | 1.7708       | 1.7674          |
| 180.00   | 98.2895                                    | 172.5836                                   | 3.3991                                     | 3.1036                                     | 0.0481                                     | 1.7559       | 1.7524          |
| 200.00   | 98.7525                                    | 172.4551                                   | 4.3641                                     | 4.1283                                     | 0.0720                                     | 1.7463       | 1.7432          |
| 250.00   | 111.8500                                   | 194.1436                                   | 6.4359                                     | 6.3069                                     | 0.1205                                     | 1.7357       | 1.7335          |
| 300.00   | 141.1681                                   | 246.6561                                   | 8.4764                                     | 8.4087                                     | 0.1533                                     | 1.7473       | 1.7457          |
| 400.00   | 246.2659                                   | 440.9796                                   | 14.1163                                    | 14.0163                                    | 0.2313                                     | 1.7907       | 1.7893          |
| 600.00   | 540.2539                                   | 913.0054                                   | 22.3788                                    | 18.4960                                    | 0.2337                                     | 1.6900       | 1.6823          |
| 1000.00  | 779.1950                                   | 1225.6187                                  | 8.7068                                     | 6.0023                                     | 0.0220                                     | 1.5729       | 1.5729          |

**Table S14.** Values for H2 in SS05

| pressure<br>[hPa] | loss CH4<br>[nmol mol-1 yr-1] | prim. prod. H2<br>[nmol mol-1 yr-1] | prim. loss H2<br>[nmol mol-1 yr-1] | sec. prod. H2<br>[nmol mol-1 yr-1] | sec. loss H2<br>[nmol mol-1 yr-1] | direct yield<br>[-] | effective yield<br>[-] |
|-------------------|-------------------------------|-------------------------------------|------------------------------------|------------------------------------|-----------------------------------|---------------------|------------------------|
| 0.01              | 69.8565                       | 31.3075                             | 14.7000                            | 0.0054                             | 0.0025                            | 1.8209              | 1.8206                 |
| 0.02              | 337.5310                      | 331.6122                            | 67.8352                            | 12.9766                            | 2.6554                            | 1.7023              | 1.6983                 |
| 0.04              | 606.5847                      | 179.3811                            | 142.6581                           | 0.0056                             | 0.0044                            | 1.2973              | 1.2597                 |
| 0.06              | 65.8750                       | 30.0831                             | 14.0082                            | 0.0039                             | 0.0018                            | 1.1627              | 1.0682                 |
| 0.08              | 822.6463                      | 956.5209                            | 97.6609                            | 22.1988                            | 2.2671                            | 0.9825              | 0.8121                 |
| 0.10              | 838.6682                      | 210.9737                            | 189.8433                           | 0.0058                             | 0.0052                            | 0.8370              | 0.6030                 |
| 0.20              | 72.8114                       | 33.3041                             | 15.3839                            | 0.0034                             | 0.0016                            | 0.1999              | 0.0000                 |
| 0.25              | 540.2539                      | 161.3481                            | 72.9615                            | 1.1051                             | 0.4996                            | 0.1554              | 0.0000                 |
| 0.50              | 738.6408                      | 80.2659                             | 80.2651                            | 0.1661                             | 0.1661                            | 0.1087              | 0.0000                 |
| 1.00              | 1047.9014                     | 225.7224                            | 218.5267                           | 0.0052                             | 0.0051                            | 0.0992              | 0.0000                 |
| 2.00              | 91.4322                       | 40.7070                             | 19.2181                            | 0.0041                             | 0.0019                            | 0.1202              | 0.0000                 |
| 4.00              | 1573.4655                     | 2041.2762                           | 82.7807                            | 24.6621                            | 1.0006                            | 0.1793              | 0.0000                 |
| 5.00              | 1227.4987                     | 220.0991                            | 220.0964                           | 0.0038                             | 0.0038                            | 0.2154              | 0.0069                 |
| 6.00              | 98.0266                       | 43.7379                             | 20.8770                            | 0.0054                             | 0.0026                            | 0.2516              | 0.0252                 |
| 8.00              | 246.2659                      | 90.7785                             | 46.9357                            | 0.6335                             | 0.3273                            | 0.2957              | 0.0605                 |
| 10.00             | 134.9099                      | 57.7337                             | 29.4662                            | 0.0068                             | 0.0035                            | 0.3369              | 0.0998                 |
| 15.00             | 141.1681                      | 56.4971                             | 25.7920                            | 0.2668                             | 0.1216                            | 0.3743              | 0.1414                 |
| 20.00             | 1921.2894                     | 3270.6006                           | 24.8572                            | 17.3760                            | 0.1323                            | 0.4112              | 0.1829                 |
| 30.00             | 345.8707                      | 53.7350                             | 53.7322                            | 0.9706                             | 0.9705                            | 0.4279              | 0.2096                 |
| 40.00             | 111.8500                      | 45.0345                             | 19.4756                            | 0.1290                             | 0.0557                            | 0.4462              | 0.2332                 |
| 50.00             | 262.0522                      | 52.3847                             | 52.3812                            | 2.0913                             | 2.0911                            | 0.4452              | 0.2350                 |
| 60.00             | 1628.0342                     | 195.7267                            | 195.7237                           | 0.0036                             | 0.0036                            | 0.4574              | 0.2461                 |
| 80.00             | 180.2899                      | 74.1418                             | 41.1766                            | 0.0078                             | 0.0043                            | 0.4567              | 0.2441                 |
| 90.00             | 98.7525                       | 39.9971                             | 17.1594                            | 0.0717                             | 0.0307                            | 0.4482              | 0.2378                 |
| 100.00            | 1917.4506                     | 3491.3965                           | 6.4972                             | 5.9922                             | 0.0112                            | 0.4378              | 0.2326                 |
| 120.00            | 98.2895                       | 39.8660                             | 17.3388                            | 0.0602                             | 0.0262                            | 0.4163              | 0.2283                 |
| 140.00            | 103.7765                      | 41.5929                             | 18.5125                            | 0.0438                             | 0.0195                            | 0.4079              | 0.2286                 |
| 160.00            | 285.4608                      | 106.8388                            | 66.4820                            | 0.0067                             | 0.0042                            | 0.4008              | 0.2226                 |
| 180.00            | 96.9287                       | 39.5372                             | 17.4011                            | 0.0367                             | 0.0161                            | 0.4056              | 0.2295                 |
| 200.00            | 90.6941                       | 37.7576                             | 17.0594                            | 0.0212                             | 0.0096                            | 0.4050              | 0.2317                 |
| 250.00            | 366.0978                      | 306.4323                            | 92.8673                            | 10.3323                            | 3.1323                            | 0.4026              | 0.2292                 |
| 300.00            | 1416.7443                     | 140.6035                            | 140.6018                           | 0.0283                             | 0.0283                            | 0.4002              | 0.2185                 |
| 400.00            | 419.0400                      | 141.1785                            | 99.3668                            | 0.0059                             | 0.0041                            | 0.3686              | 0.1793                 |
| 600.00            | 75.4939                       | 33.0509                             | 15.4928                            | 0.0080                             | 0.0037                            | 0.2987              | 0.1647                 |
| 1000.00           | 779.1950                      | 265.8364                            | 38.3675                            | 0.5181                             | 0.0748                            | 0.3412              | 0.3412                 |
