# Supplementary material for: Investigating the yield of H 2 O and H 2 from methane oxidation in the stratosphere
Source: Copernicus journal article supplement (doi:10.5194/acp-18-9955-2018), 2018-07-13
Supplement: Supplementary file [file acp-18-9955-2018-supplement-title-page.pdf › acp-18-9955-2018-supplement-title-page.pdf]

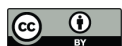

*Supplement of*

## **Investigating the yield of H<sub>2</sub>O and H<sub>2</sub> from methane oxidation in the stratosphere**

**Franziska Frank et al.**

*Correspondence to:* Franziska Frank ([franziska.frank@dlr.de](mailto:franziska.frank@dlr.de))

- [acp-18-9955-2018-supplement-title-page.pdf](#)
- [supplement](#)
  - [meccanism.pdf](#)
  - [supplement.pdf](#)

The copyright of individual parts of the supplement might differ from the CC BY 4.0 License.
